# Supplementary material for: Predictive value of isolated symptoms for diagnosis of SARS-CoV-2 infection in children tested during peak circulation of the delta variant
Source: bioRxiv or medRxiv preprint supplement (doi:10.1101/2021.12.17.21267993), 2021-12-17
Supplement: Supplementary file [file media-1.pdf]

**Supplementary Table 1.** Percentage of Unvaccinated Children Who Tested Positive by Symptom Status

| Symptom Status | <i>All Participants</i> |                                      | <i>Excluding Participants with Fever</i> |                                      |
|----------------|-------------------------|--------------------------------------|------------------------------------------|--------------------------------------|
|                | Total Participants      | Participants Who Tested Positive (%) | Total Participants                       | Participants Who Tested Positive (%) |
| 0 symptoms     | 114                     | 10 (8.8%)                            | 114                                      | 10 (8.8%)                            |
| 1 symptom      | 71                      | 23 (32.4%)                           | 58                                       | 15 (27.8%)                           |
| 2+ symptoms    | 329                     | 94 (28.6%)                           | 137                                      | 29 (21.2%)                           |

**Supplementary Table 2.** Percentage of Unvaccinated Children Who Had a Known or Suspected Close Contact and Who Tested Positive by Symptom Status

| Symptom Status                   | Total Participants | Participants Who Had a Known or Suspected Close Contact (%) | Test Positive Rate (%) in Participants with a Known or Suspected Close Contact (%) | Participants Who Did Not Have a Known or Suspected Close Contact (%) | Test Positive Rate (%) in Participants with No Known or Suspected Close Contact |
|----------------------------------|--------------------|-------------------------------------------------------------|------------------------------------------------------------------------------------|----------------------------------------------------------------------|---------------------------------------------------------------------------------|
| <i>Unvaccinated participants</i> |                    |                                                             |                                                                                    |                                                                      |                                                                                 |
| 0 symptom                        | 114                | 62 (54.4%)                                                  | 9 (14.5%)                                                                          | 52 (45.6%)                                                           | 1 (1.9%)                                                                        |
| 1 symptom                        | 71                 | 41 (57.8%)                                                  | 19 (46.3%)                                                                         | 30 (42.2%)                                                           | 4 (13.3%)                                                                       |
| 2+ symptoms                      | 329                | 147 (44.7%)                                                 | 59 (40.1%)                                                                         | 182 (55.3%)                                                          | 35 (19.2%)                                                                      |

**Supplementary Table 3.** Diagnostic Accuracy of Isolated Symptoms in Unvaccinated Children who Presented with One Symptom

| Symptom                            | Overall<br>N=71 | Negative<br>N=48 | Positive<br>N=23 | Sensitivity          | Specificity          | PPV                  | NPV                  |
|------------------------------------|-----------------|------------------|------------------|----------------------|----------------------|----------------------|----------------------|
| Fever                              | 13              | 5                | 8                | 0.35<br>(0.15, 0.54) | 0.90<br>(0.81, 0.98) | 0.62<br>(0.35, 0.88) | 0.74<br>(0.63, 0.85) |
| Chills                             | 0               | 0                | 0                | NA                   | NA                   | NA                   | NA                   |
| Congestion/<br>rhinorrhea          | 18              | 16               | 2                | 0.09<br>(0.00, 0.20) | 0.67<br>(0.53, 0.80) | 0.11<br>(0.00, 0.26) | 0.60<br>(0.47, 0.74) |
| Cough                              | 18              | 12               | 6                | 0.26<br>(0.08, 0.44) | 0.75<br>(0.63, 0.87) | 0.33<br>(0.12, 0.55) | 0.68<br>(0.55, 0.80) |
| Headache                           | 5               | 3                | 2                | 0.09<br>(0.00, 0.20) | 0.94<br>(0.87, 1.00) | 0.40<br>(0.00, 0.83) | 0.68<br>(0.57, 0.79) |
| Sore throat                        | 9               | 4                | 5                | 0.22<br>(0.05, 0.39) | 0.92<br>(0.84, 0.99) | 0.56<br>(0.23, 0.88) | 0.71<br>(0.60, 0.82) |
| Fatigue                            | 0               | 0                | 0                | NA                   | NA                   | NA                   | NA                   |
| Arthralgias                        | 0               | 0                | 0                | NA                   | NA                   | NA                   | NA                   |
| Myalgias                           | 0               | 0                | 0                | NA                   | NA                   | NA                   | NA                   |
| Photophobia                        | 0               | 0                | 0                | NA                   | NA                   | NA                   | NA                   |
| Vomiting                           | 2               | 2                | 0                | 0.00<br>(0.00, 0.00) | 0.96<br>(0.90, 1.00) | 0.00<br>(0.00, 0.00) | 0.67<br>(0.56, 0.78) |
| Nausea                             | 0               | 0                | 0                | NA                   | NA                   | NA                   | NA                   |
| Diarrhea                           | 3               | 3                | 0                | 0.00<br>(0.00, 0.00) | 0.94<br>(0.87, 1.00) | 0.00<br>(0.00, 0.00) | 0.66<br>(0.55, 0.77) |
| Abdominal pain                     | 3               | 3                | 0                | 0.00<br>(0.00, 0.00) | 0.94<br>(0.87, 1.00) | 0.00<br>(0.00, 0.00) | 0.66<br>(0.55, 0.77) |
| Loss of sense of<br>taste or smell | 0               | 0                | 0                | NA                   | NA                   | NA                   | NA                   |
| Shortness of<br>breath             | 0               | 0                | 0                | NA                   | NA                   | NA                   | NA                   |
